# Supplementary material for: Nutritional Regimes Enriched with Antioxidants as an Efficient Adjuvant for IBD Patients under Infliximab Administration, a Pilot Study
Source: MDPI journal article supplement (doi:10.3390/antiox11010138), 2022-01-08
Supplement: s1 [file s1]

## SUPPLEMENTARY MATERIAL

**Table S1:** Bromatological composition of the diet

| Nutrient                | Daily Intake | Nutrient                   | Daily Intake | Nutrient                        | Daily Intake |
|-------------------------|--------------|----------------------------|--------------|---------------------------------|--------------|
| Alcohol (mg)            | 0.00         | Selenium (µg)              | 44.88        | Tyrosine (mg)                   | 3053.42      |
| Protein (g)             | 95.85        | C4:0-C10:0 (g)             | 2.38         | Phenylalanine (mg)              | 3652.50      |
| Fat (g)                 | 49.60        | C12:0 lauric (g)           | 0.83         | Tryptophan (mg)                 | 791.87       |
| Carbohydrate (g)        | 332.16       | C14:0 myristic (g)         | 2.76         | Polyalcohol (mg)                | 0.00         |
| Amid (g)                | 248.72       | C16:0 palmitic (g)         | 10.11        | Animal Protein (g)              | 48.14        |
| Oligosaccharides (g)    | 64.79        | C18:0 stearic (g)          | 3.45         | Vegetal Protein (g)             | 47.71        |
| Total Fiber (g)         | 30.60        | C20:0 arachidic (g)        | 0.03         | Asparagine (mg)                 | 0.00         |
| Cholesterol (mg)        | 155.30       | C22:0 behenic (g)          | 0.02         | Glutamine (mg)                  | 0.00         |
| Saturated Fat (g)       | 20.31        | C14:1 Myristoleic Acid (g) | 0.06         | Pyrimidine (mg)                 | 0.00         |
| Polyunsaturated Fat (g) | 5.39         | C16:1 Palmitoleic Acid (g) | 0.87         | Total Mineral (mg)              | 0.00         |
| Monounsaturated Fat (g) | 23.91        | C18:1 Oleic (g)            | 1.24         | Chlorine (mg)                   | 0.00         |
| Calcium (mg)            | 1254.80      | C20:1 Eicosaenoic (g)      | 0.00         | Chromium (µg)                   | 0.00         |
| Sodium (mg)             | 1528.13      | C22:1 Erucic (g)           | 0.00         | Fluorine (mg)                   | 33.89        |
| Potassium (mg)          | 3267.24      | C18:2 Linoleic (g)         | 1.05         | Iodine (µg)                     | 150.72       |
| Phosphorus (mg)         | 1550.30      | C18:3 Linolenic (g)        | 0.13         | Manganese (mg)                  | 2.97         |
| Iron (mg)               | 12.45        | C20:4 Arachidonic (g)      | 0.14         | Molybdenum (µg)                 | 3.74         |
| Zinc (mg)               | 18.24        | C20:5 EPA (g)              | 0.01         | Nickel (mg)                     | 0.00         |
| Folic Acid (µg)         | 528.83       | C22:6 DHA (g)              | 0.03         | Beta-carotene (mg)              | 8845.28      |
| Niacin (mg)             | 15.15        | Phytic Acid (g)            | 0.27         | Alpha-tocopherol (mg)           | 3.62         |
| Riboflavin (mg)         | 1.20         | Lysine (mg)                | 5594.45      | Vitamin K (µg)                  | 65.49        |
| Thiamin (mg)            | 1.11         | Histidine (mg)             | 2156.18      | Vitamin B5 (mg)                 | 3.64         |
| Vitamin A (µg)          | 3093.40      | Arginine (mg)              | 4108.58      | Vitamin B8 – Biotin (µg)        | 1.10         |
| Vitamin B6 (mg)         | 1.95         | Aspartic Acid (mg)         | 7008.88      | Vitamin B12 (µg)                | 3.36         |
| Vitamin C (mg)          | 150.41       | Threonine (mg)             | 3026.57      | Caffeine (mg)                   | 0.00         |
| Vitamin D (µg)          | 0.85         | Serine (mg)                | 3857.69      | Inulin (mg)                     | 0.00         |
| Vitamin E (mg)          | 11.46        | Glutamic Acid (mg)         | 12,457.08    | Taurine (mg)                    | 0.00         |
| Oxalic Acid (mg)        | 25.20        | Proline (mg)               | 4890.48      | Choline (mg)                    | 0.00         |
| Cellulose (g)           | 1.50         | Glycine (mg)               | 2765.93      | L-Carnitine (mg)                | 0.00         |
| Purine (mg)             | 225.90       | Alanine (mg)               | 3375.25      | Bicarbonate (mg)                | 0.00         |
| Water (g)               | 865.34       | Cysteine (mg)              | 742.24       | H-Orac (µmol)                   | 9892.00      |
| Insoluble Fiber (g)     | 18.00        | Valine (mg)                | 3789.72      | L-Orac (µmol)                   | 162.00       |
| Soluble Fiber (g)       | 3.48         | Methionine (mg)            | 1887.60      | Total-Orac (µmol)               | 9939.00      |
| Magnesium (mg)          | 221.23       | Isoleucine (mg)            | 3382.51      | Total Polyphenols (mg)          | 914.80       |
| Copper (mg)             | 2.35         | Leucine (mg)               | 6076.85      | Potential Renal Acid Load (mEq) | 13.65        |

**Table S2:** Description of the physical and hematological data at the follow-up times (N:47). Statistically significant differences (p-value  $\leq 0.05$ ) are underlined in bold.

|                                                  | T0                  |                        | T3                  |                        | p-value                |
|--------------------------------------------------|---------------------|------------------------|---------------------|------------------------|------------------------|
|                                                  | mean $\pm$ SD       | median<br>(min to max) | mean $\pm$ SD       | median<br>(min to max) |                        |
| Height (m)                                       | 1.66 $\pm$ 0.1      | 1.66 (1.47 to 1.88)    | 1.66 $\pm$ 0.1      | 1.66 (1.47 to 1.88)    | --                     |
| Weight (Kg)                                      | 65.09 $\pm$ 14.15   | 61.9 (45.7 to 93.5)    | 65.09 $\pm$ 14.15   | 61.9 (45.7 to 93.5)    | --                     |
| BMI (Kg/m <sup>2</sup> )                         | 23.83 $\pm$ 4.19    | 23.48 (17.43 to 34.44) | 23.83 $\pm$ 4.19    | 23.48 (17.43 to 34.44) | --                     |
| Red Blood Cells (10 <sup>6</sup> cells/ $\mu$ L) | 4.74 $\pm$ 0.55     | 4.66 (3.68 to 6.32)    | 4.83 $\pm$ 0.56     | 4.81 (3.83 to 6.32)    | 0.09                   |
| Hemoglobin (g/L)                                 | 12.52 $\pm$ 1.9     | 12.35 (8.8 to 15.7)    | 12.82 $\pm$ 1.7     | 12.8 (9.5 to 15.9)     | 0.08                   |
| Transferrin (mg/dL)                              | 256.04 $\pm$ 48.51  | 256.5 (140 to 350)     | 270.89 $\pm$ 55.94  | 265 (146 to 383)       | <b><u>0.03</u></b>     |
| Ferritin (ng/mL)                                 | 58.06 $\pm$ 66.12   | 41.4 (3.6 to 330.1)    | 55.09 $\pm$ 71.11   | 30.1 (1.7 to 311.7)    | <b><u>&lt;0.01</u></b> |
| Iron (%)                                         | 49.92 $\pm$ 30.2    | 45 (14 to 144)         | 70.04 $\pm$ 39.57   | 63 (10 to 206)         | <b><u>&lt;0.01</u></b> |
| Albumin (g/dL)                                   | 3.65 $\pm$ 0.47     | 3.65 (2.5 to 4.8)      | 3.88 $\pm$ 0.44     | 4 (2.7 to 4.6)         | <b><u>&lt;0.01</u></b> |
| Ceruloplasmin (mg/dL)                            | 32.8 $\pm$ 12.09    | 30.6 (13.8 to 83)      | 29.05 $\pm$ 10.01   | 27.2 (12.5 to 58.9)    | <b><u>&lt;0.01</u></b> |
| Alpha-1 Antitrypsin (mg/dL)                      | 219.44 $\pm$ 54.06  | 212.5 (136 to 370)     | 197.53 $\pm$ 51.05  | 189 (109 to 329)       | <b><u>&lt;0.01</u></b> |
| White Blood Cells (10 <sup>3</sup> / $\mu$ L)    | 9.02 $\pm$ 3.33     | 8.45 (2.72 to 17.57)   | 7.12 $\pm$ 2.12     | 7.03 (3.78 to 17.76)   | <b><u>&lt;0.01</u></b> |
| Basophil (%)                                     | 0.42 $\pm$ 0.22     | 0.4 (0.1 to 1)         | 0.6 $\pm$ 0.32      | 0.6 (0.1 to 1.8)       | <b><u>&lt;0.01</u></b> |
| Basophil (10 <sup>3</sup> cells/ $\mu$ L)        | 0.04 $\pm$ 0.02     | 0.03 (0.01 to 0.11)    | 0.04 $\pm$ 0.02     | 0.04 (0.01 to 0.09)    | 0.26                   |
| Eosinophil (%)                                   | 2.12 $\pm$ 2.04     | 1.4 (0.1 to 9.1)       | 2.61 $\pm$ 1.76     | 2.2 (0.3 to 8)         | <b><u>0.01</u></b>     |
| Eosinophil (10 <sup>3</sup> / $\mu$ L)           | 0.2 $\pm$ 0.25      | 0.1 (0.01 to 1.28)     | 0.18 $\pm$ 0.14     | 0.14 (0.02 to 0.6)     | 0.19                   |
| Neutrophil (%)                                   | 65.9 $\pm$ 9.61     | 66.9 (42.3 to 85.3)    | 55.27 $\pm$ 10.63   | 55.2 (36.2 to 85.3)    | <b><u>&lt;0.01</u></b> |
| Neutrophil (10 <sup>3</sup> cells/ $\mu$ L)      | 6.16 $\pm$ 2.64     | 5.87 (1.8 to 12.01)    | 4.03 $\pm$ 1.7      | 3.79 (1.43 to 10.4)    | <b><u>&lt;0.01</u></b> |
| Monocytes (%)                                    | 7.92 $\pm$ 2.11     | 7.3 (4.3 to 12.1)      | 8.7 $\pm$ 2.44      | 8.8 (2.4 to 13.7)      | <b><u>0.02</u></b>     |
| Monocytes (10 <sup>3</sup> cells/ $\mu$ L)       | 0.72 $\pm$ 0.33     | 0.61 (0.29 to 1.97)    | 0.61 $\pm$ 0.26     | 0.58 (0.25 to 1.9)     | <b><u>0.03</u></b>     |
| Lymphocytes (%)                                  | 23.65 $\pm$ 8.72    | 23.45 (8.1 to 43.8)    | 32.83 $\pm$ 8.81    | 33.9 (11.7 to 46.8)    | <b><u>&lt;0.01</u></b> |
| Lymphocytes (10 <sup>3</sup> cells/ $\mu$ L)     | 2.01 $\pm$ 0.73     | 1.9 (0.99 to 4.59)     | 2.19 $\pm$ 0.74     | 2.03 (0.14 to 4.84)    | <b><u>&lt;0.01</u></b> |
| Platelets (10 <sup>3</sup> cells/ $\mu$ L)       | 338.67 $\pm$ 132.81 | 308 (157 to 893)       | 292.17 $\pm$ 103.92 | 272 (152 to 779)       | <b><u>&lt;0.01</u></b> |

**Table S3:** Description of physical and hematological data in T3 according to the type of treatment. (N: 47). Statistically significant differences (p-value  $\leq 0.05$ ) are underlined in bold.

|                                            | T3             |                        |                 |                        | p-value            |
|--------------------------------------------|----------------|------------------------|-----------------|------------------------|--------------------|
|                                            | RFT            |                        | RED             |                        |                    |
|                                            | mean ± SD      | median (min to max)    | mean ± SD       | median (min to max)    |                    |
| Height (m)                                 | 1.64 ± 0.11    | 1.61 (1.47 to 1.88)    | 1.67 ± 0.1      | 1.68 (1.49 to 1.83)    | 0.45               |
| Weight (Kg)                                | 65.4 ± 13.66   | 63.3 (45.7 to 93)      | 65.19 ± 15.29   | 61.15 (49 to 93.5)     | 0.90               |
| BMI (Kg/m²)                                | 24.42 ± 4.42   | 24.27 (17.64 to 34.44) | 23.25 ± 3.86    | 23.45 (17.43 to 29.77) | 0.45               |
| Red Blood Cells (10 <sup>6</sup> cells/μL) | 4.76 ± 0.56    | 4.81 (3.83 to 6.18)    | 4.92 ± 0.56     | 4.88 (4.1 to 6.32)     | 0.41               |
| Hemoglobin (g/L)                           | 12.91 ± 1.77   | 13.6 (9.5 to 15.3)     | 12.7 ± 1.63     | 12.6 (10.3 to 15.9)    | 0.53               |
| Transferrin (mg/dL)                        | 274.44 ± 48.69 | 277 (180 to 358)       | 266.1 ± 65.49   | 257.5 (146 to 383)     | 0.77               |
| Ferritin (ng/mL)                           | 45 ± 43.58     | 29.3 (3 to 161.7)      | 68.71 ± 96.45   | 30.6 (1.7 to 311.7)    | 0.87               |
| Iron (%)                                   | 73.56 ± 36.3   | 69 (14 to 145)         | 65.3 ± 44.13    | 60.5 (10 to 206)       | 0.37               |
| Albumin (g/dL)                             | 3.88 ± 0.41    | 4 (3 to 4.4)           | 3.88 ± 0.49     | 3.95 (2.7 to 4.6)      | 0.82               |
| Ceruloplasmin (mg/dL)                      | 32.28 ± 11.08  | 32.7 (14 to 58.9)      | 24.67 ± 6.29    | 23.45 (12.5 to 37.6)   | <b><u>0.01</u></b> |
| Alpha-1 Antitrypsin (mg/dL)                | 203.04 ± 54.32 | 189 (139 to 299)       | 190.1 ± 46.59   | 189 (109 to 329)       | 0.65               |
| White Blood Cells (10 <sup>3</sup> /μL)    | 6.97 ± 1.62    | 7.05 (3.78 to 10.21)   | 7.33 ± 2.68     | 6.98 (4.52 to 17.76)   | 0.85               |
| Basophil (%)                               | 0.58 ± 0.27    | 0.6 (0.1 to 1.1)       | 0.62 ± 0.38     | 0.6 (0.2 to 1.8)       | 0.84               |
| Basophil (10 <sup>3</sup> cells/μL)        | 0.04 ± 0.02    | 0.04 (0.01 to 0.08)    | 0.04 ± 0.02     | 0.04 (0.01 to 0.09)    | 0.78               |
| Eosinophil (%)                             | 2.48 ± 2.02    | 1.9 (0.3 to 8)         | 2.77 ± 1.37     | 2.45 (0.7 to 5.6)      | 0.20               |
| Eosinophil (10 <sup>3</sup> /μL)           | 0.17 ± 0.15    | 0.12 (0.02 to 0.6)     | 0.2 ± 0.12      | 0.18 (0.06 to 0.56)    | 0.09               |
| Neutrophil (%)                             | 55.35 ± 12.41  | 53.4 (36.2 to 85.3)    | 55.16 ± 7.92    | 57.25 (40.6 to 66.2)   | 0.85               |
| Neutrophil (10 <sup>3</sup> cells/μL)      | 3.98 ± 1.69    | 3.67 (1.43 to 8.71)    | 4.11 ± 1.76     | 3.84 (1.91 to 10.4)    | 0.57               |
| Monocytes (%)                              | 8.71 ± 2.84    | 8.8 (2.4 to 13.7)      | 8.7 ± 1.84      | 8.85 (4.4 to 11.9)     | 0.93               |
| Monocytes (10 <sup>3</sup> cells/μL)       | 0.58 ± 0.18    | 0.58 (0.25 to 0.97)    | 0.65 ± 0.34     | 0.6 (0.28 to 1.9)      | 0.69               |
| Lymphocytes (%)                            | 32.88 ± 10.36  | 34.4 (11.7 to 46.8)    | 32.76 ± 6.4     | 31.65 (21.1 to 44.5)   | 0.67               |
| Lymphocytes (10 <sup>3</sup> cells/μL)     | 2.09 ± 0.76    | 2.01 (0.14 to 3.36)    | 2.34 ± 0.7      | 2.25 (1.54 to 4.84)    | 0.34               |
| Platelets (10 <sup>3</sup> cells/μL)       | 265.67 ± 58.53 | 260 (152 to 450)       | 327.95 ± 138.25 | 309.5 (187 to 779)     | 0.07               |

**Table S4:** Description of physical and hematological data at follow-up observation (T3) in CD patients, according to the type of treatment. (N: 22). Statistically significant differences (p-value  $\leq 0.05$ ) are underlined in bold.

|                                            | CD             |                        |                |                        |                    |
|--------------------------------------------|----------------|------------------------|----------------|------------------------|--------------------|
|                                            | RFT            |                        | RED            |                        | p-value            |
|                                            | mean ± SD      | median<br>(min to max) | mean ± SD      | median<br>(min to max) |                    |
| Height (m)                                 | 1.66 ± 0.08    | 1.61 (1.57 to 1.81)    | 1.65 ± 0.11    | 1.67 (1.49 to 1.8)     | 0.66               |
| Weight (Kg)                                | 63.09 ± 12.39  | 63.3 (45.7 to 84.5)    | 68.27 ± 18.39  | 60.5 (49.9 to 93.5)    | 0.64               |
| BMI (Kg/m²)                                | 22.77 ± 3.69   | 21.9 (17.64 to 28)     | 24.71 ± 4.13   | 25.22 (18.34 to 29.77) | 0.25               |
| Red Blood Cells (10 <sup>6</sup> cells/uL) | 4.87 ± 0.67    | 4.88 (3.89 to 6.18)    | 4.88 ± 0.56    | 4.88 (4.1 to 6.15)     | 0.99               |
| Hemoglobin (g/L)                           | 13.05 ± 1.67   | 12.6 (10 to 15.3)      | 12.21 ± 1.43   | 12.5 (10.3 to 14.4)    | 0.31               |
| Transferrin (mg/dL)                        | 277 ± 47.8     | 277 (195 to 345)       | 289.56 ± 67.89 | 258 (206 to 383)       | 0.50               |
| Ferritin (ng/mL)                           | 35.6 ± 29.39   | 22.9 (6.8 to 89.6)     | 61.66 ± 98.09  | 25.7 (4.4 to 305.2)    | 0.94               |
| Iron (%)                                   | 74.54 ± 30.11  | 69 (28 to 124)         | 74.22 ± 58.23  | 63 (20 to 206)         | 0.57               |
| Albumin (g/dL)                             | 3.94 ± 0.3     | 4 (3.5 to 4.3)         | 3.92 ± 0.38    | 3.7 (3.5 to 4.5)       | 0.89               |
| Ceruloplasmin (mg/dL)                      | 34.85 ± 12.7   | 36.3 (17.5 to 58.9)    | 23.94 ± 7.53   | 23.2 (12.5 to 37.6)    | 0.06               |
| Alpha-1 Antitrypsin (mg/dL)                | 200.31 ± 50.52 | 189 (143 to 299)       | 164.89 ± 31.09 | 172 (109 to 196)       | 0.17               |
| White Blood Cells (10 <sup>3</sup> /μL)    | 7.28 ± 1.66    | 7.11 (3.95 to 10.21)   | 7.25 ± 0.97    | 7.2 (6.04 to 9.24)     | 0.94               |
| Basophil (%)                               | 0.58 ± 0.27    | 0.7 (0.1 to 0.9)       | 0.57 ± 0.27    | 0.6 (0.2 to 1.1)       | 0.73               |
| Basophil (10 <sup>3</sup> cells/μL)        | 0.04 ± 0.02    | 0.05 (0.01 to 0.07)    | 0.04 ± 0.02    | 0.04 (0.01 to 0.08)    | 0.99               |
| Eosinophil (%)                             | 2.44 ± 2.19    | 1.7 (0.3 to 8)         | 2.24 ± 1.58    | 1.8 (0.7 to 5.6)       | 0.81               |
| Eosinophil (10 <sup>3</sup> /μL)           | 0.17 ± 0.16    | 0.13 (0.02 to 0.6)     | 0.16 ± 0.12    | 0.13 (0.06 to 0.41)    | 0.86               |
| Neutrophil (%)                             | 56.69 ± 14.12  | 55.2 (36.2 to 85.3)    | 57.32 ± 7.18   | 58.1 (48 to 66.2)      | 0.81               |
| Neutrophil (10 <sup>3</sup> cells/μL)      | 4.3 ± 1.99     | 4 (1.43 to 8.71)       | 4.17 ± 0.83    | 3.88 (2.97 to 5.9)     | 0.69               |
| Monocytes (%)                              | 8.56 ± 3.09    | 9.7 (2.4 to 12.4)      | 7.74 ± 1.8     | 8.4 (4.4 to 9.7)       | 0.27               |
| Monocytes (10 <sup>3</sup> cells/μL)       | 0.6 ± 0.22     | 0.58 (0.25 to 0.97)    | 0.56 ± 0.17    | 0.6 (0.28 to 0.79)     | 0.73               |
| Lymphocytes (%)                            | 31.75 ± 11.53  | 33.9 (11.7 to 46.8)    | 32.12 ± 5      | 30.7 (24.6 to 39.4)    | 0.92               |
| Lymphocytes (10 <sup>3</sup> cells/μL)     | 1.94 ± 0.78    | 2.01 (0.14 to 3.36)    | 2.31 ± 0.37    | 2.4 (1.83 to 2.92)     | 0.20               |
| Platelets (10 <sup>3</sup> cells/μL)       | 247.69 ± 44.34 | 250 (157 to 342)       | 300.78 ± 52.1  | 299 (221 to 367)       | <b><u>0.03</u></b> |

**Table S5:** Description of physical and hematological data at follow-up observation (T3) in UC patients, according to the type of treatment. (N: 25). Statistically significant differences (p-value  $\leq 0.05$ ) are underlined in bold.

|                                                  | UC                 |                        |                     |                        |                    |
|--------------------------------------------------|--------------------|------------------------|---------------------|------------------------|--------------------|
|                                                  | RFT                |                        | RED                 |                        | p-value            |
|                                                  | mean $\pm$ SD      | median<br>(min to max) | mean $\pm$ SD       | median<br>(min to max) |                    |
| Height (m)                                       | 1.63 $\pm$ 0.13    | 1.6 (1.47 to 1.88)     | 1.68 $\pm$ 0.09     | 1.69 (1.54 to 1.83)    | 0.22               |
| Weight (Kg)                                      | 67.56 $\pm$ 14.87  | 67 (46.3 to 93)        | 62.66 $\pm$ 12.57   | 61.8 (49 to 85)        | 0.50               |
| BMI (Kg/m <sup>2</sup> )                         | 25.96 $\pm$ 4.61   | 24.59 (18.59 to 34.44) | 22.06 $\pm$ 3.35    | 22.58 (17.43 to 27.68) | <b><u>0.04</u></b> |
| Red Blood Cells (10 <sup>6</sup> cells/ $\mu$ L) | 4.65 $\pm$ 0.42    | 4.78 (3.83 to 5.12)    | 4.96 $\pm$ 0.58     | 4.89 (4.38 to 6.32)    | 0.38               |
| Hemoglobin (g/L)                                 | 12.79 $\pm$ 1.92   | 13.7 (9.5 to 14.9)     | 13.09 $\pm$ 1.74    | 12.7 (10.3 to 15.9)    | 0.78               |
| Transferrin (mg/dL)                              | 272.07 $\pm$ 51.18 | 275 (180 to 358)       | 246.91 $\pm$ 59.67  | 254 (146 to 335)       | 0.32               |
| Ferritin (ng/mL)                                 | 53.72 $\pm$ 53.21  | 38.1 (3 to 161.7)      | 74.48 $\pm$ 99.49   | 32.8 (1.7 to 311.7)    | 0.89               |
| Iron (%)                                         | 72.64 $\pm$ 42.39  | 74.5 (14 to 145)       | 58 $\pm$ 29.27      | 58 (10 to 127)         | 0.47               |
| Albumin (g/dL)                                   | 3.84 $\pm$ 0.5     | 3.9 (3 to 4.4)         | 3.85 $\pm$ 0.58     | 4 (2.7 to 4.6)         | 0.91               |
| Ceruloplasmin (mg/dL)                            | 29.9 $\pm$ 9.16    | 29.25 (14 to 47.8)     | 25.26 $\pm$ 5.39    | 25.3 (14.4 to 33.6)    | 0.18               |
| Alpha-1 Antitrypsin (mg/dL)                      | 205.57 $\pm$ 59.41 | 208 (139 to 287)       | 210.73 $\pm$ 48.07  | 209 (158 to 329)       | 0.84               |
| White Blood Cells (10 <sup>3</sup> / $\mu$ L)    | 6.68 $\pm$ 1.59    | 6.54 (3.78 to 9.05)    | 7.41 $\pm$ 3.58     | 6.77 (4.52 to 17.76)   | 0.80               |
| Basophil (%)                                     | 0.59 $\pm$ 0.29    | 0.55 (0.1 to 1.1)      | 0.66 $\pm$ 0.46     | 0.6 (0.3 to 1.8)       | 0.91               |
| Basophil (10 <sup>3</sup> cells/ $\mu$ L)        | 0.04 $\pm$ 0.02    | 0.04 (0.01 to 0.08)    | 0.04 $\pm$ 0.02     | 0.04 (0.02 to 0.09)    | 0.73               |
| Eosinophil (%)                                   | 2.53 $\pm$ 1.94    | 2.05 (0.5 to 6.9)      | 3.2 $\pm$ 1.07      | 3.2 (2 to 5.1)         | 0.10               |
| Eosinophil (10 <sup>3</sup> / $\mu$ L)           | 0.17 $\pm$ 0.15    | 0.11 (0.04 to 0.55)    | 0.23 $\pm$ 0.12     | 0.19 (0.14 to 0.56)    | <b><u>0.02</u></b> |
| Neutrophil (%)                                   | 54.11 $\pm$ 10.98  | 49.15 (42.6 to 73.5)   | 53.38 $\pm$ 8.39    | 56.9 (40.6 to 64.6)    | 0.89               |
| Neutrophil (10 <sup>3</sup> cells/ $\mu$ L)      | 3.67 $\pm$ 1.36    | 3.32 (1.61 to 6.65)    | 4.06 $\pm$ 2.31     | 3.76 (1.91 to 10.4)    | 0.76               |
| Monocytes (%)                                    | 8.84 $\pm$ 2.7     | 8.65 (3.8 to 13.7)     | 9.48 $\pm$ 1.54     | 9.2 (7.1 to 11.9)      | 0.31               |
| Monocytes (10 <sup>3</sup> cells/ $\mu$ L)       | 0.57 $\pm$ 0.15    | 0.56 (0.34 to 0.84)    | 0.72 $\pm$ 0.42     | 0.6 (0.4 to 1.9)       | 0.44               |
| Lymphocytes (%)                                  | 33.94 $\pm$ 9.46   | 38.2 (17.3 to 44.7)    | 33.28 $\pm$ 7.55    | 31.7 (21.1 to 44.5)    | 0.78               |
| Lymphocytes (10 <sup>3</sup> cells/ $\mu$ L)     | 2.23 $\pm$ 0.75    | 2.19 (1.12 to 3.34)    | 2.36 $\pm$ 0.91     | 2.11 (1.54 to 4.84)    | 0.80               |
| Platelets (10 <sup>3</sup> cells/ $\mu$ L)       | 282.36 $\pm$ 66.43 | 286.5 (152 to 450)     | 350.18 $\pm$ 181.48 | 320 (187 to 779)       | 0.45               |

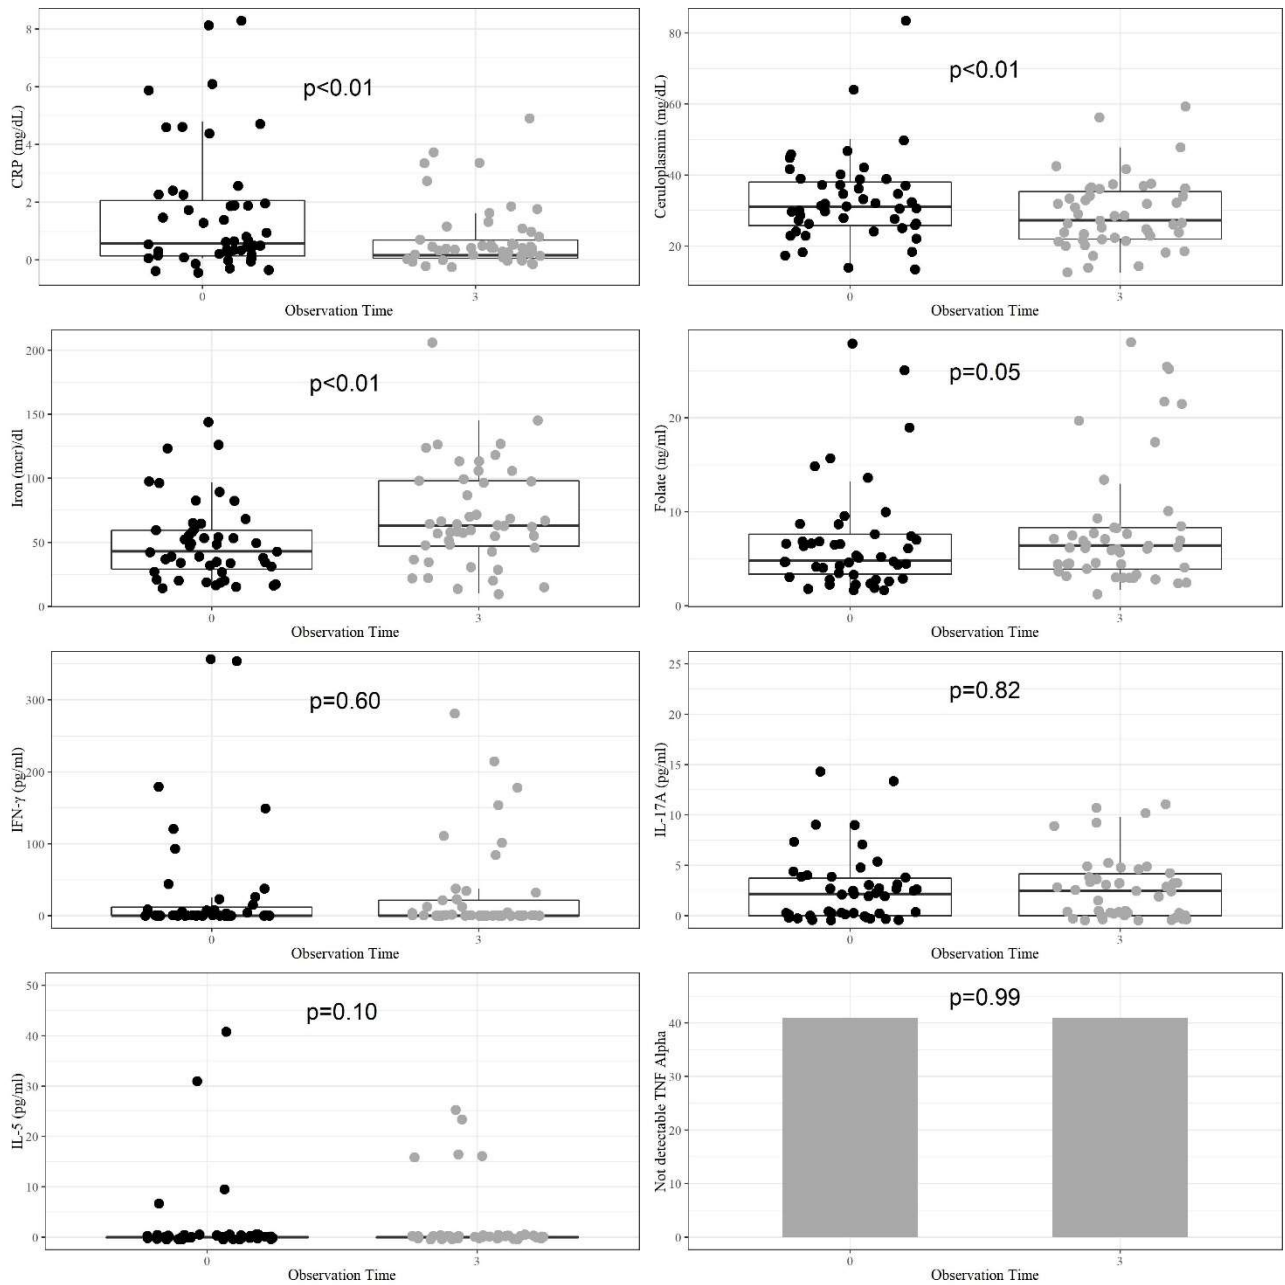

**Figure S1:** Serological biomarkers that were different between the two groups at T0 and T3 in all the enrolled subjects (N: 47)

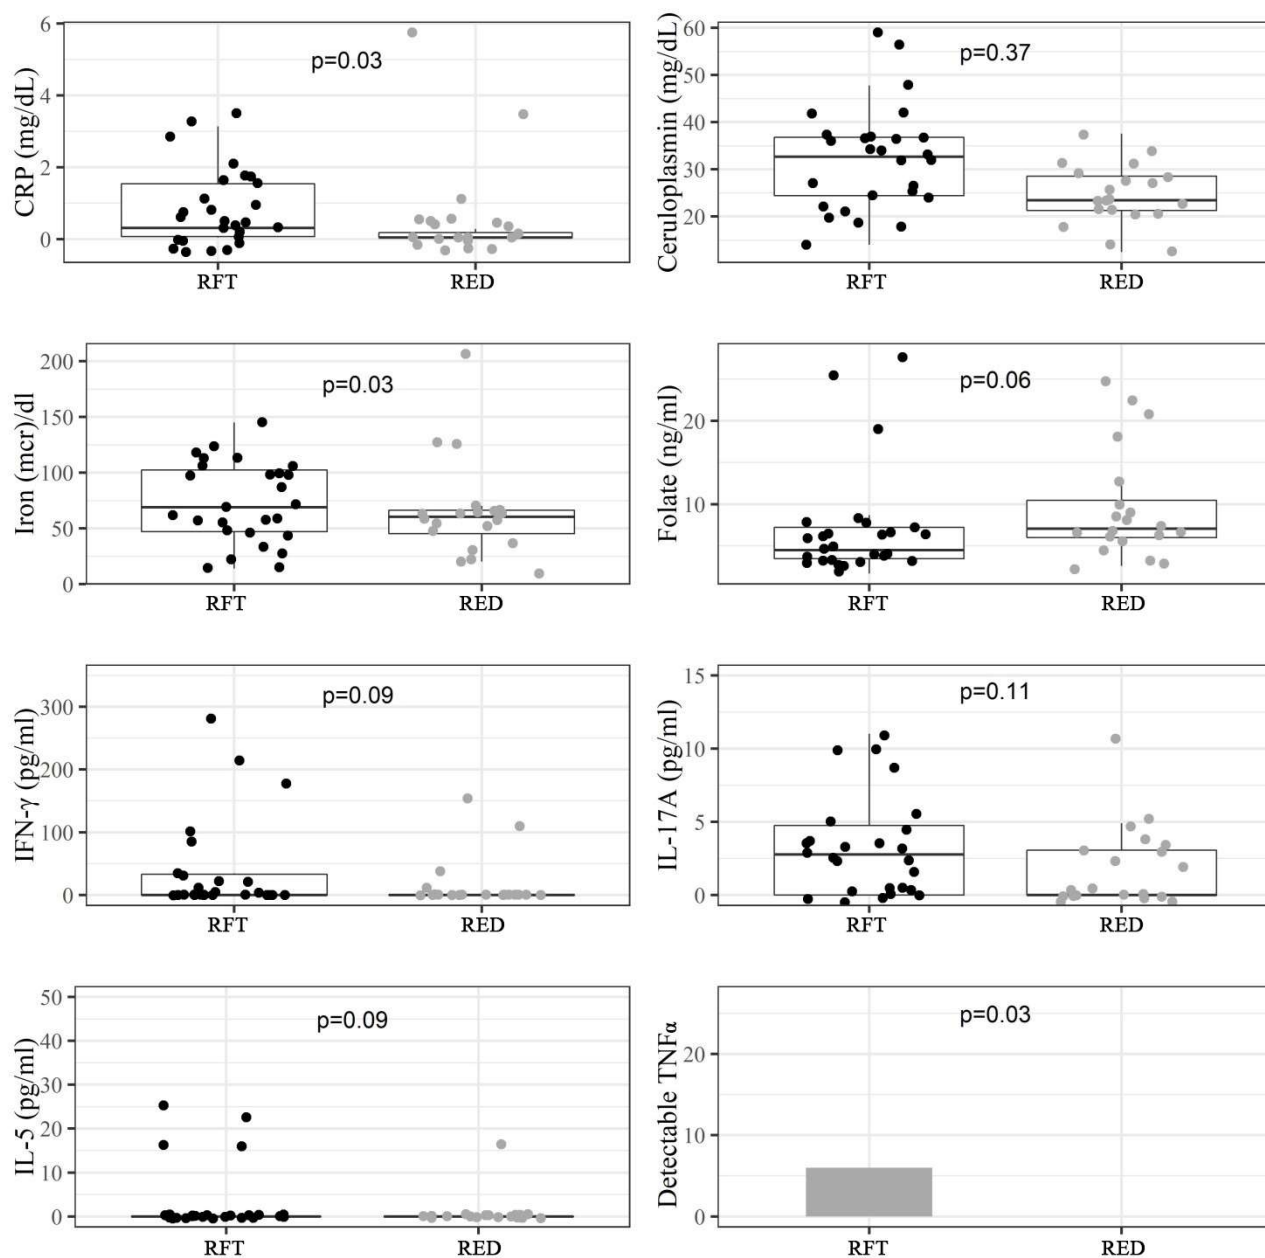

**Figure S2:** Serological biomarkers that were different between the red fruit tea (RFT) or purple corn extract (RED) groups at T3 (N: 47)

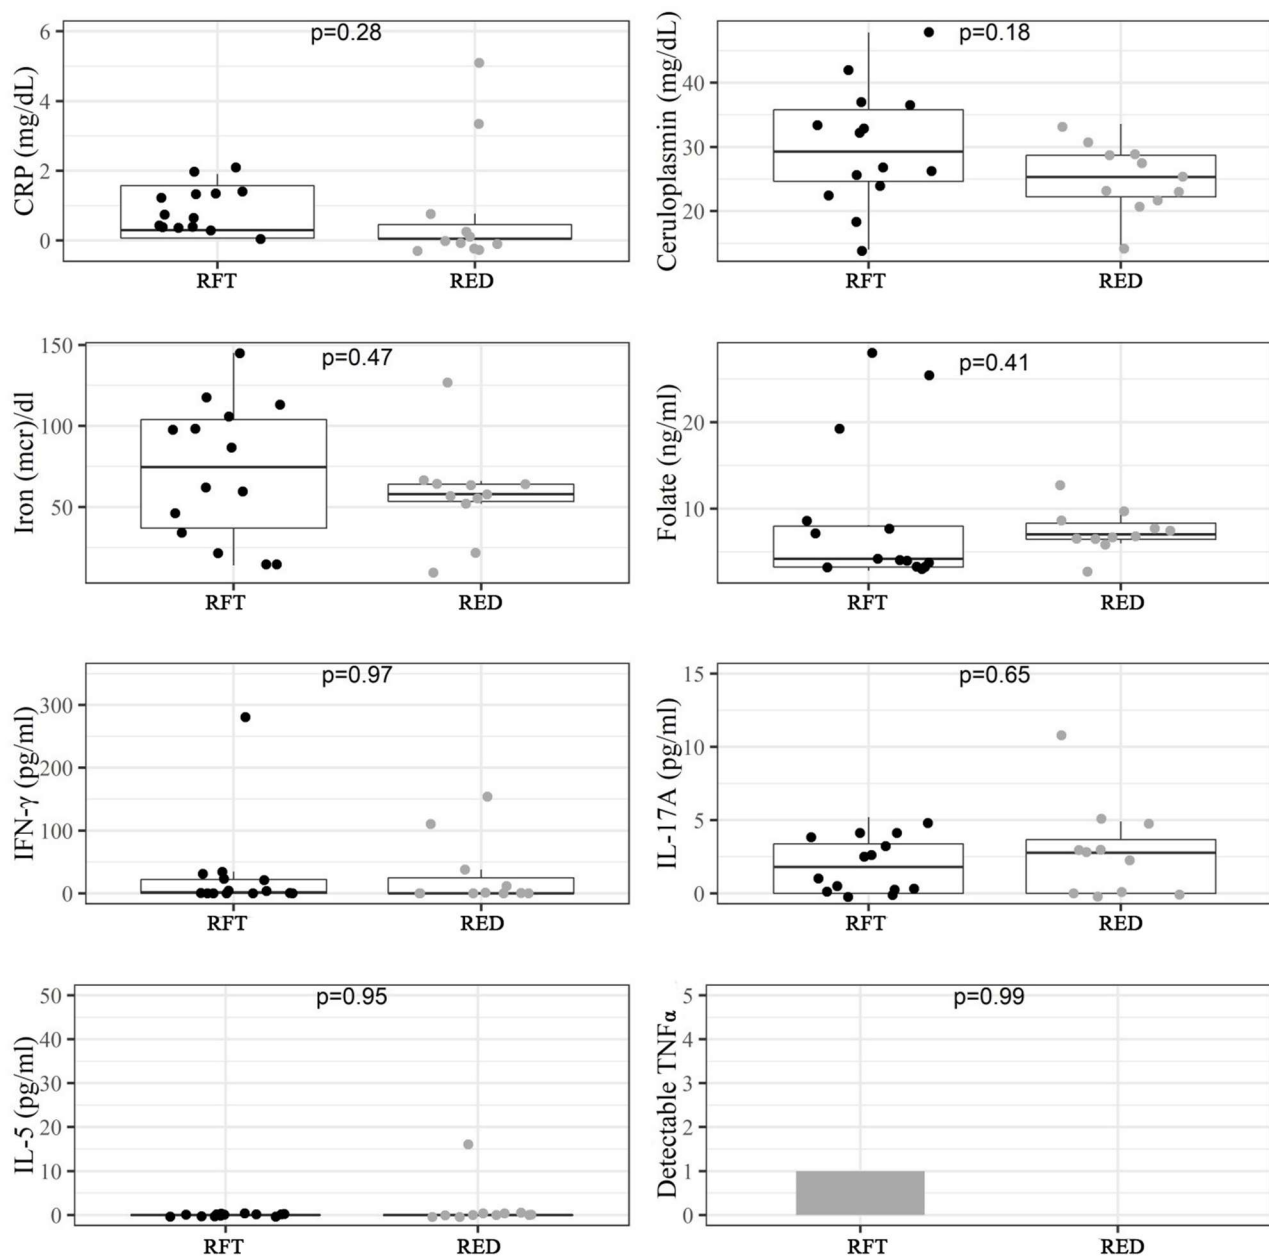

**Figure S3:** Serological biomarkers that were different between the red fruit tea (RFT) and purple corn extract (RED) groups in UC patients at T3 (N: 25)
